# Supplementary material
Source: PubMed Central journal article supplement (PMC9841765)

2157  
2158  
2159  
2160  
2161 **[Supporting Information]**  
2162

2163  
2164  
2165 **Biochemical characterization of bacterial FeoBs: A perspective on nucleotide**  
2166 **specificity**  
2167

2168  
2169  
2170  
2171  
2172 Minhye Shin<sup>1,#</sup>, Jinsub Park<sup>1,#</sup>, Yerin Jin<sup>1</sup>, Shelley M. Payne<sup>2</sup>, and Kyoung Heon Kim<sup>1,\*</sup>  
2173

2174  
2175  
2176 <sup>1</sup>Department of Biotechnology, Graduate School, Korea University, Seoul 02841, Republic of  
2177 Korea  
2178

2179  
2180  
2181 <sup>2</sup>Department of Molecular Biosciences, College of Natural Science, The University of Texas at  
2182 Austin, Austin, TX, 78712, USA  
2183

2184  
2185  
2186  
2187 #Minhye Shin and Jinsub Park contributed equally to this work  
2188

2189 \***Corresponding author:** Kyoung Heon Kim, Department of Biotechnology, Graduate School,  
2190 Korea University, Seoul, Republic of Korea  
2191

2192  
2193 E-mail address: [khekim@korea.ac.kr](mailto:khekim@korea.ac.kr)  
2194

2195  
2196 Tel: +82-2-3290-3028.  
2197

2198  
2199  
2200 **Running head:** Bacterial FeoBs with two distinct nucleotide specificities  
2201

2202 **Keywords:** Feo, ferrous iron transport, GTPase, ATPase, Potassium  
2203  
2204  
2205  
2206

2213  
2214  
2215  
2216  
2217  
2218  
2219  
2220  
2221  
2222  
2223  
2224  
2225  
2226  
2227  
2228  
2229  
2230  
2231  
2232  
2233  
2234  
2235  
2236  
2237  
2238  
2239  
2240  
2241  
2242  
2243  
2244  
2245  
2246  
2247  
2248  
2249  
2250  
2251  
2252  
2253

**Supplementary Fig. S1.** Without addition of potassium, the GTPase (A) or ATPase (B) activity in the group of GTP-specific NFeoBs was not stimulated by any metal ions. The enzyme reaction buffer contained 10 mM NaCl. The error bars represent the standard deviation.

**(A)**

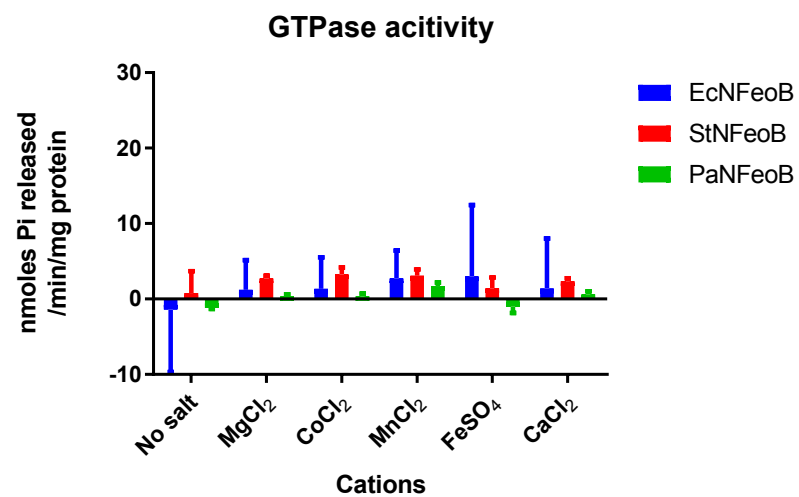

**(B)**

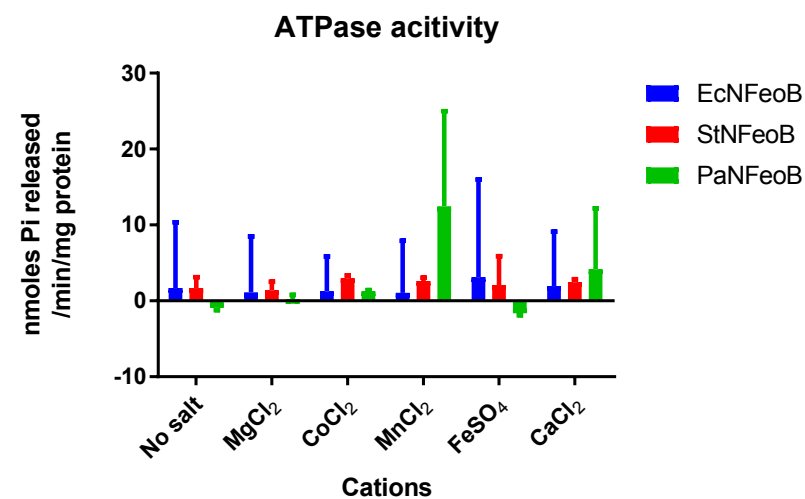

2254  
 2255  
 2256  
 2257  
 2258 **Supplementary Fig. S2.** Both the cytosolic domain and whole FeoB sequences of GTP-specific  
 2259 725 bacteria were grouped as gamma-proteobacteria, while NTP-specific bacteria were present in  
 2260 various bacterial phyla. Phylogenetic analysis of cytosolic domains (A) and full-length (B) sequences of  
 2261 FeoB indicates clear separation of bacterial strains into either GTP-specific or NTP-specific groups.  
 2262 Bacterial strains in the analysis were selected based on publications where their FeoB was studied.  
 2263 Bacterial strains studied were represented as GTPase or NTPase. Phylogenetic assay was  
 2264 730 conducted using Phylogeny.fr (<http://www.phylogeny.fr/index.cgi>).

2266  
 2267 **(A) NFeoB**

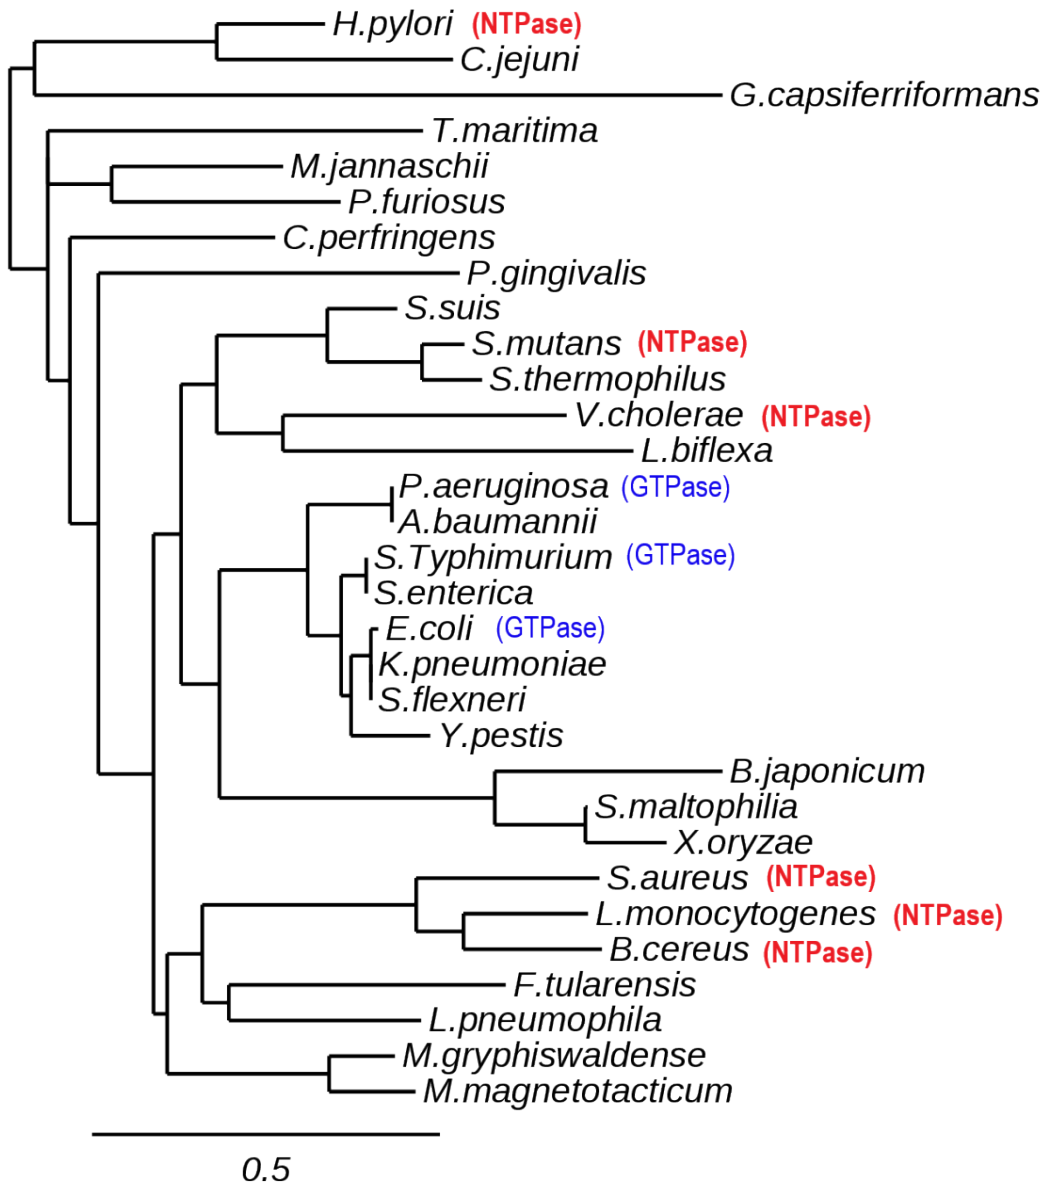

(B) Whole FeoB

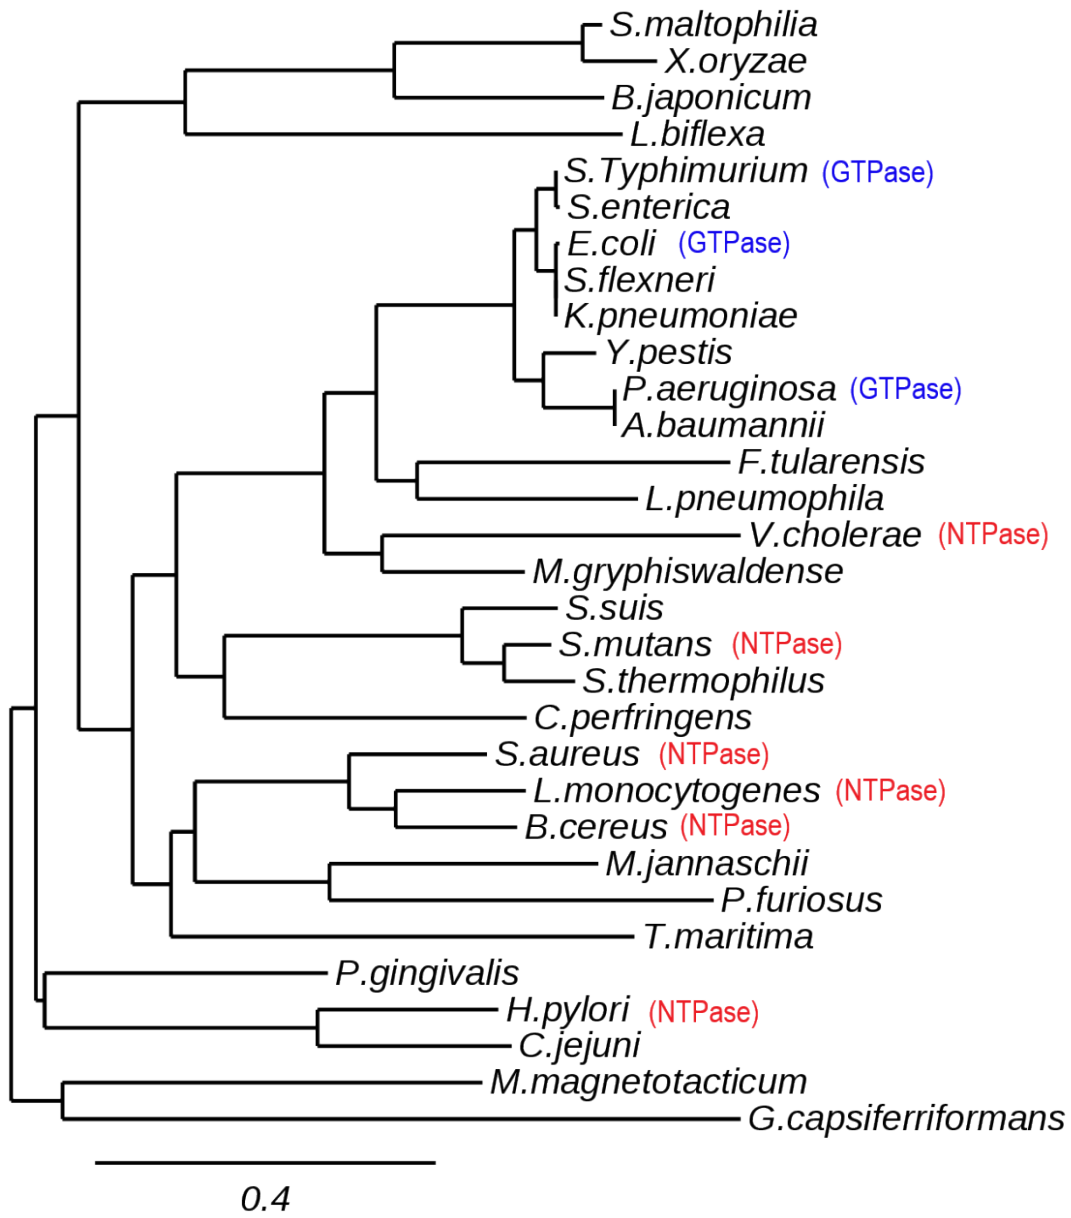

Supplement: NIHMS1624573-supplement-1.pdf [file NIHMS1624573-supplement-1.pdf]
